# Supplementary material for: Comparison of body pressure distribution in healthy subjects between bubble wrap and an emergency mattress laid on a cardboard bed: a randomized controlled crossover trial
Source: PeerJ. 2023 Mar 31;11:e15173. doi: 10.7717/peerj.15173 (PMC10069418; doi:10.7717/peerj.15173)
Supplement: Supplemental Information 3 — These data were used for statistical analysis to compare no mattress, bubble wrap, and emergency air mattress. [file peerj-11-15173-s003.xlsx]

## Sheet: Sheet1
				Body pressure (supine)			Body pressure (lateral)			Contour area (supine)			Contour area (lateral)			Subjective firmness (VAS)			Subjective comfort (VAS)
ID	Sequence	Age	BMI	no mattress	bubble wrap	air mattress	no mattress	bubble wrap	air mattress	no mattress	bubble wrap	air mattress	no mattress	bubble wrap	air mattress	no mattress	bubble wrap	air mattress	no mattress	bubble wrap	air mattress
1	1	22	23.3	37	37.5	25	38.5	35.5	30.5	1027.04	1070.16	2512.72	1093.68	1164.24	2214.8	6.40449	4.94382	2.92135	6.40449	4.94382	2.92135
2	1	21	22.8	41	41	30.5	44	43.5	39.5	1865.92	1783.6	2003.12	1666	1458.24	1709.12	7.75281	6.17978	2.13483	7.75281	6.17978	2.13483
3	1	23	33	52	48	41	51	45	45	2112.88	2336.32	1842.4	1924.72	2116.8	1685.6	9.55056	8.8764	1.23596	9.55056	8.8764	1.23596
4	1	22	20.8	42	39	30.5	47.5	43	40.5	1646.4	1822.8	2191.28	1415.12	1509.2	2014.88	7.07865	6.51685	2.13483	7.07865	6.51685	2.13483
5	1	21	18.8	38	38	29.5	37	37.5	31	1195.6	1321.04	2332.4	1258.32	1328.88	2018.8	5.73034	5.61798	2.80899	5.73034	5.61798	2.80899
6	2	22	24.2	48.5	45	34.5	46	45.5	41.5	1599.36	1270.08	1846.32	1411.2	1281.84	1677.76	9.4382	8.31461	1.1236	7.52809	5.8427	2.02247
7	2	22	19	40.5	38.5	30	37	38.5	35	1305.36	1234.8	2481.36	1348.48	1176	2175.6	7.64045	2.35955	1.34831	7.52809	6.74157	2.13483
8	2	21	21.5	33.5	38.5	29	43.5	41	34.5	1415.12	1489.6	3045.84	1070.16	1505.28	2794.96	5.2809	4.38202	1.1236	7.86517	6.40449	1.91011
9	2	21	18.8	31.5	33	26	38	40	37.5	1583.68	1634.64	2418.64	1262.24	1607.2	2034.48	7.97753	6.29213	2.24719	8.42697	5.05618	0.11236
10	2	21	26	40	38	33	46.5	44.5	42.5	2214.8	2034.48	1956.08	1673.84	1658.16	1834.56	7.52809	4.83146	2.58427	10	3.03371	3.93258
11	1	22	21.5	40.5	40	29.5	37.5	37.5	35	1372	1662.08	2500.96	1407.28	1611.12	2210.88	7.52809	5.8427	2.02247	7.64045	3.70787	0.561798
12	1	22	18.8	40.5	41.5	30.5	39	37.5	34.5	1242.64	1603.28	2171.68	1046.64	1168.16	1963.92	7.52809	6.74157	2.13483	8.76404	7.64045	3.82022
13	1	21	21	45	47	33	49	42.5	35.5	1438.64	1407.28	2085.44	1105.44	1277.92	1842.4	7.86517	6.40449	1.91011	7.19101	4.94382	4.60674
14	2	22	22	39	41	30	38.5	41	37.5	1787.52	1395.52	2477.44	1677.76	1430.8	2112.88	8.8764	6.62921	1.79775	5.8427	4.7191	3.14607
15	2	22	19.4	39	38.5	27	41	38.5	34.5	1344.56	1548.4	2116.8	1097.6	1395.52	1912.96	8.65169	7.86517	2.13483	9.4382	8.31461	1.1236
16	1	21	19.2	38.5	39.5	29	41	42	34.5	1313.2	1513.12	2363.76	1070.16	1230.88	1897.28	8.42697	5.05618	0.11236	7.64045	2.35955	1.34831
17	2	22	21.2	42.5	40	32	39	38.5	35.5	1254.4	1716.96	2316.72	1352.4	1344.56	1975.68	8.08989	7.19101	0.337079	5.2809	4.38202	1.1236
18	2	21	20.9	37	37	31.5	38.5	39	37.5	1375.92	1532.72	2218.72	1611.12	1611.12	1760.08	7.75281	5.73034	2.24719	7.97753	6.29213	2.24719
19	1	22	22.1	37.5	37.5	32.5	41	42.5	38.5	2105.04	2289.28	2265.76	1591.52	1748.32	1983.52	10	3.03371	3.93258	7.52809	4.83146	2.58427
20	1	21	21	39	39.5	29.5	39	38	33.5	1375.92	1489.6	2093.28	1372	1470	1834.56	7.64045	3.70787	0.561798	8.8764	6.62921	1.79775
21	2	21	18.8	40.5	38.5	30.5	41.5	41.5	37	1458.24	1481.76	2700.88	1293.6	1364.16	2218.72	4.49438	3.59551	0.786517	8.65169	7.86517	2.13483
22	2	22	18.5	36.5	35	30	39.5	41.5	40.5	1716.96	1113.28	2148.16	1242.64	1038.8	1865.92	7.75281	6.96629	1.34831	8.08989	7.19101	0.337079
23	2	21	20.5	39.5	39	29	42.5	40.5	36	1368.08	1226.96	1799.28	1403.36	1368.08	1630.72	9.21348	6.29213	2.92135	7.75281	5.73034	2.24719
24	1	21	19.5	41.5	41	30	42	39.5	36.5	1372	1172.08	1858.08	1297.52	1199.52	1830.64	8.76404	7.64045	3.82022	4.49438	3.59551	0.786517
25	2	22	18	38	38.5	26	37.5	36.5	28.5	1128.96	1509.2	2159.92	1050.56	1203.44	2038.4	5.8427	4.49438	2.69663	7.75281	6.96629	1.34831
26	1	21	18.1	35.5	35.5	27	36.5	36.5	32	1360.24	1407.28	2210.88	1242.64	1352.4	2030.56	7.19101	4.94382	4.60674	9.21348	6.29213	2.92135
27	1	21	20.1	38	36.5	28	40	39	35.5	1446.48	1787.52	2250.08	1211.28	1720.88	1920.8	5.8427	4.7191	3.14607	5.8427	4.49438	2.69663
