# Supplementary material for: Comparison of body pressure distribution in healthy subjects between bubble wrap and an emergency mattress laid on a cardboard bed: a randomized controlled crossover trial
Source: PeerJ. 2023 Mar 31;11:e15173. doi: 10.7717/peerj.15173 (PMC10069418; doi:10.7717/peerj.15173)

調査日 年 月 日 / Date/Month/Year

ID: 性別： 男性 ・ 女性./ Gender; Male. Female 年齢： 歳 /Age. y BMI：

BMI = 体重kg ÷ (身長m)<sup>2</sup>として計算します。

BMI = measured weight (kg) / height<sup>2</sup> (m)

本研究では以下に該当する方は研究にご参加いただくことができません。該当しないかご確認ください /Please check if any of them apply to you.

☐以下の状況に該当しません/ Not applicable ☐（番号： ）に該当します/Applicable (No. )

- 1 :腰背部痛を含む筋骨格系の疼痛または慢性的な痺れを有する方/Person suffering from musculoskeletal or neurogenic pain
- 2 :仰臥位または側臥位を取ることで疼痛が生じる方/Person with difficulty in supine and lateral positions for pain with positioning
- 3 :急変の可能性のある疾病を有する方/Person who have a disease that may change suddenly

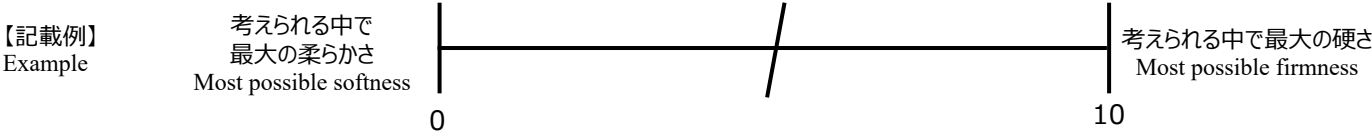

質問 1：ご自身が横になられたときに感じた寝心地について伺います/Comfort while lying down

あなたの状態を表す箇所（0-10）に縦線を引いてください/ Please make a cross on the below line (0 -10) that best represents your feelings.

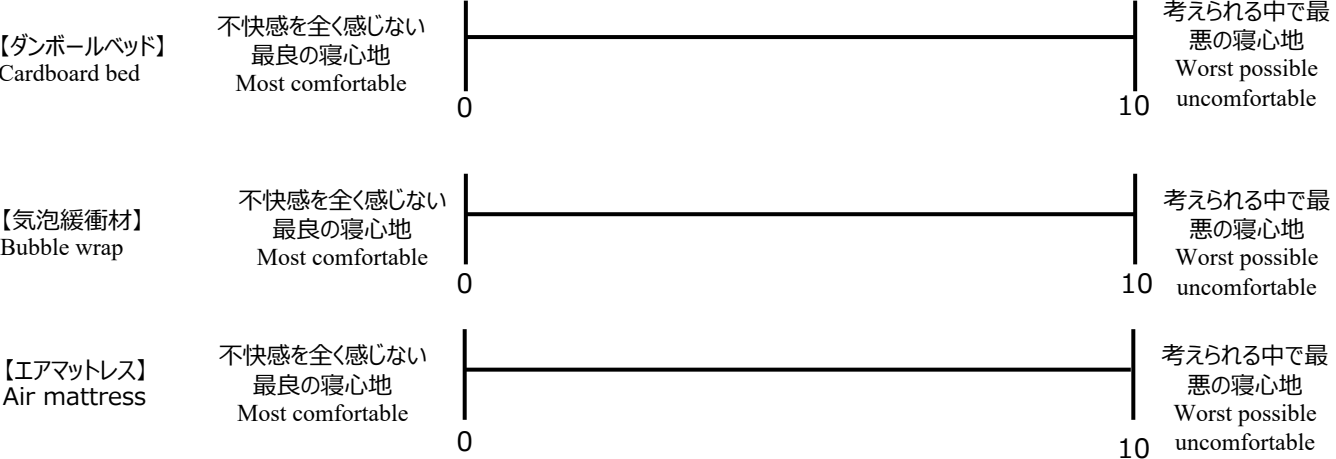

質問 2：ご自身が横になられたときに感じたベッド（マットレス）の硬さについて伺います/ Firmness while lying down

該当する線分上の箇所に縦線を引いてください/ Please make a cross on the below line (0 -10) that best represents your feelings.

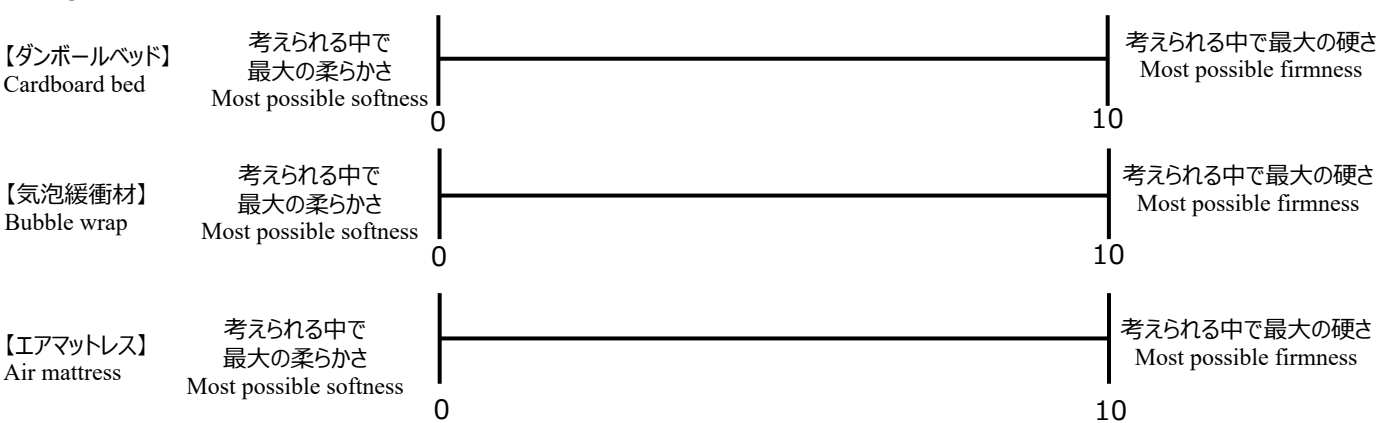

Supplement: Supplemental Information 4 [file peerj-11-15173-s004.pdf]
